# Supplementary material for: Polymer-dispersed liquid-crystal-based switchable glazing fabricated via vacuum glass coupling
Source: PubMed Central journal article supplement — RSC Adv. 2020 Sep 1;10(53):32225–31. doi: 10.1039/d0ra05911k (PMC9056553; doi:10.1039/d0ra05911k), 2020-09-01
Supplement: RA-010-D0RA05911K-s001.pdf [file RA-010-D0RA05911K-s001.pdf]

## Supplementary Information

### **Polymer Dispersed Liquid Crystal based Switchable Glazing Fabricated via Vacuum Glass Coupling**

*Naila Nasir<sup>1</sup>, Hyeryeon Hong<sup>1</sup>, Malik Abdul Rehman<sup>1</sup>, Sunil Kumar<sup>1</sup>, Yongho Seo<sup>1\*</sup>*

*<sup>1</sup> Department of Nanotechnology & Advanced Materials Engineering and HMC, Sejong  
University, Seoul 05006, Republic of Korea*

\* Corresponding author: yseo@sejong.ac.kr

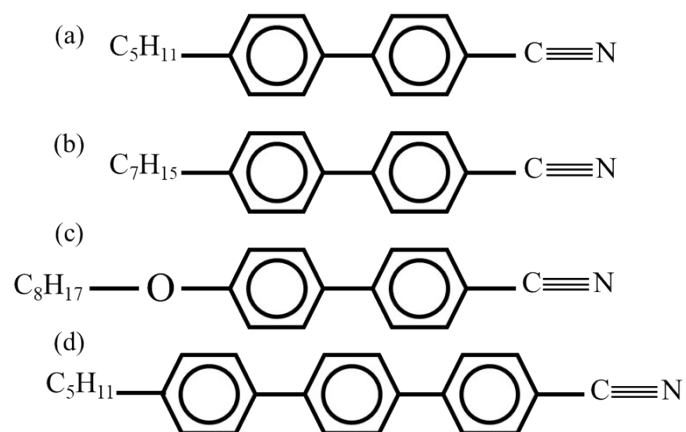

**Figure S1:** Chemical Structure of LC E7 where (a) 4-pentyl-4'-cyanobiphenyl (51%), (b) 4-heptyl-4'-cyanobiphenyl (25%), (c) 4-octyloxy-4'-cyanobiphenyl (16%), and (d) 4-pentyl-4'-cyanobiphenyl (8%) are mixed.

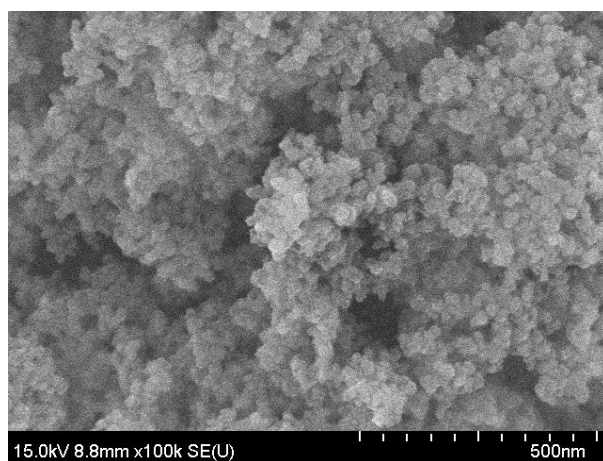

**Figure S2:** SEM image of  $\text{SiO}_2$  nanoparticles, dissolved in ethanol and dried on a substrate.

**Table S1:** Characteristics of  $\text{SiO}_2$  nanoparticles.

|                                                 |                                                                                                                           |
|-------------------------------------------------|---------------------------------------------------------------------------------------------------------------------------|
| Purity (%)                                      | 97.3+                                                                                                                     |
| Color                                           | white                                                                                                                     |
| Average Particle Size (nm)                      | 16                                                                                                                        |
| Specific Surface Area ( $\text{m}^2/\text{g}$ ) | 150-550                                                                                                                   |
| Loss of Weight in Drying (wt%)                  | 5,4                                                                                                                       |
| Loss of Weight on Ignition (wt%)                | 9,4                                                                                                                       |
| PH                                              | 6.0                                                                                                                       |
| Bulk Density ( $\text{g}/\text{cm}^3$ )         | <0.05                                                                                                                     |
| True Density ( $\text{g}/\text{cm}^3$ )         | 2,2                                                                                                                       |
| Elemental Analysis (%)                          | <div> <math>\text{SiO}_2</math> : Silane Mg Ca S </div> <div> Fe </div> <div> 97.3 : 2.0 0.005 0.022 0.0126 0.0056 </div> |

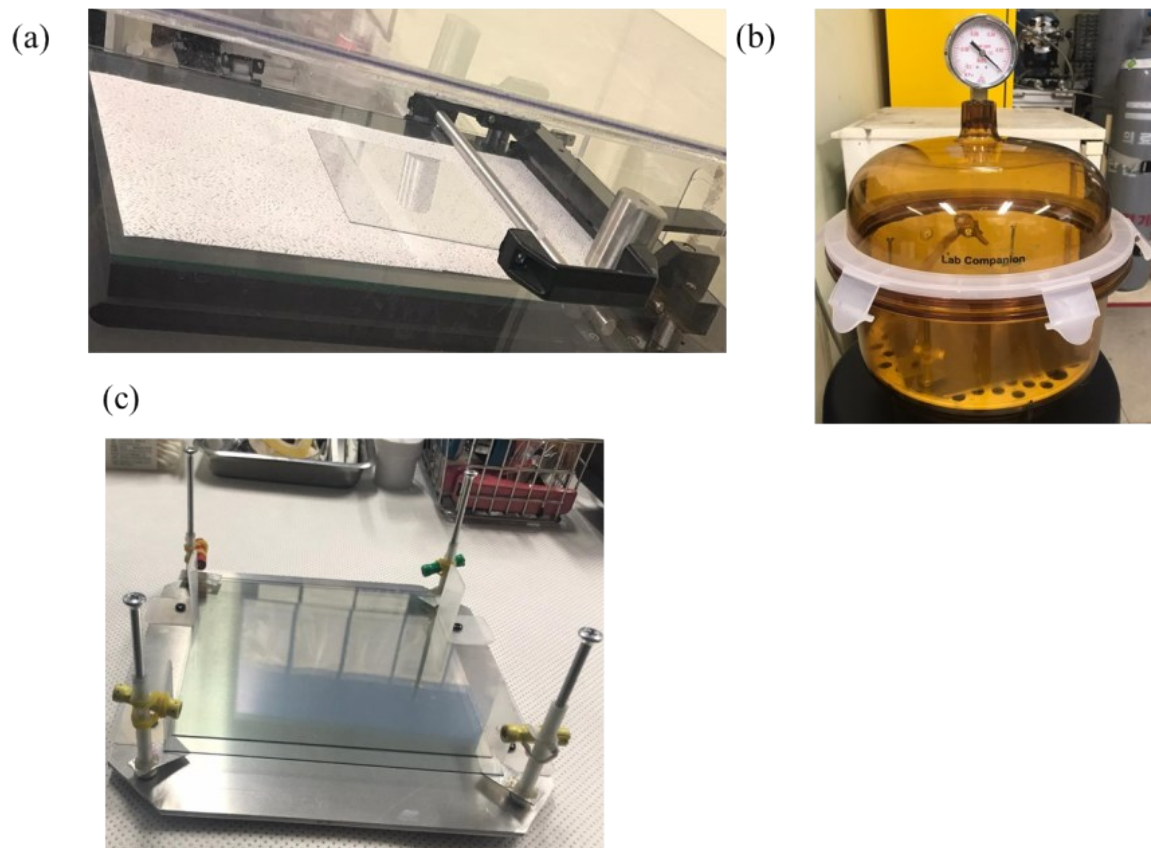

**Figure S3:** (a) Wire-bar coater was used to coat the PDLC mixture. (b) In a vacuum chamber a vacuum assembly holds the top and bottom glasses for vacuum coupling. (c) Vacuum assembly was designed to hold the top and bottom glasses for vacuum coupling.

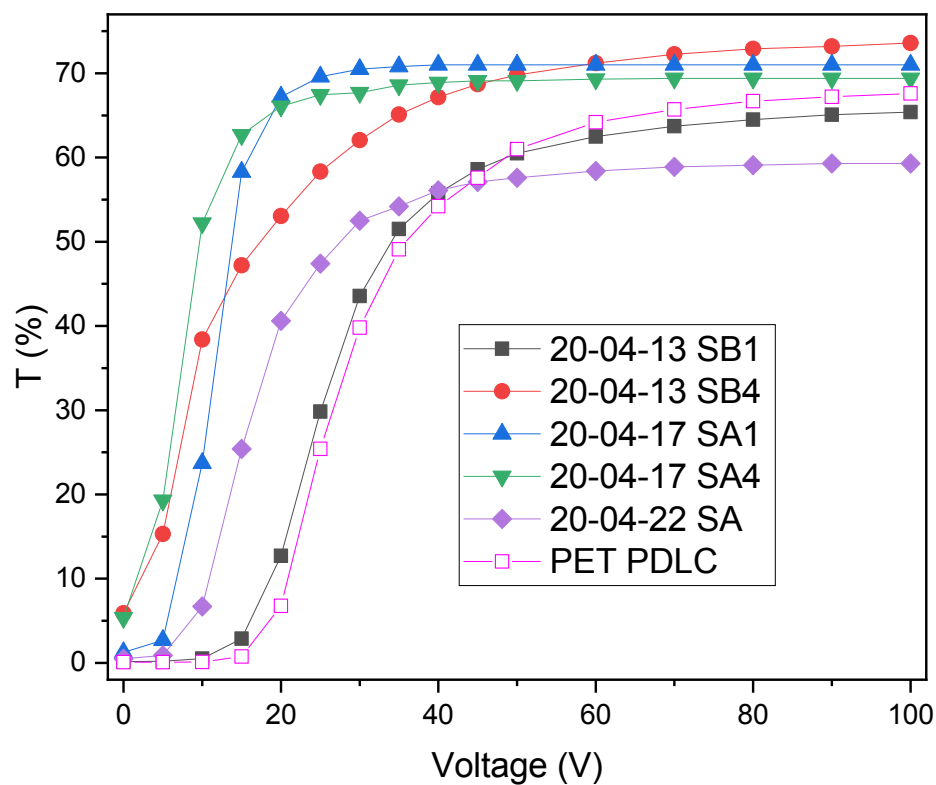

**Figure S4:** Transmittance-versus-voltage curves for various PDLC samples fabricated in different conditions, as shown in Table S1.

**Table S2:** Fabrication conditions for samples

| Sample number | substrate | method       | Bead | Thickness ( $\mu\text{m}$ ) |
|---------------|-----------|--------------|------|-----------------------------|
| 20-04-13 SB1  | glass     | Injection    | O    | 88                          |
| 20-04-13 SB4  | glass     | Bar coating  | O    | 20                          |
| 20-04-17 SA1  | glass     | Injection    | X    | 75                          |
| 20-04-17 SA4  | glass     | Bar coating  | X    | 50                          |
| 20-04-22 SA   | glass     | Bar coating  | O    | 25                          |
| PET PDLC      | PET       | Roll-to-Roll | X    | 25                          |
